# Supplementary material for: Transdermal Permeation and Anti-Inflammation Activities of Novel Sinomenine Derivatives
Source: Molecules. 2016 Nov 17;21(11):1520. doi: 10.3390/molecules21111520 (PMC6273864; doi:10.3390/molecules21111520)
Supplement: Supplementary file 1 [file molecules-21-01520-s001.pdf]

# Supplementary Materials: Transdermal Permeation and Anti-Inflammation Activities of Novel Sinomenine Derivatives

Zi-Jian Zhao, Chang Zhao, Jing Xiao and Jian-Cheng Wang

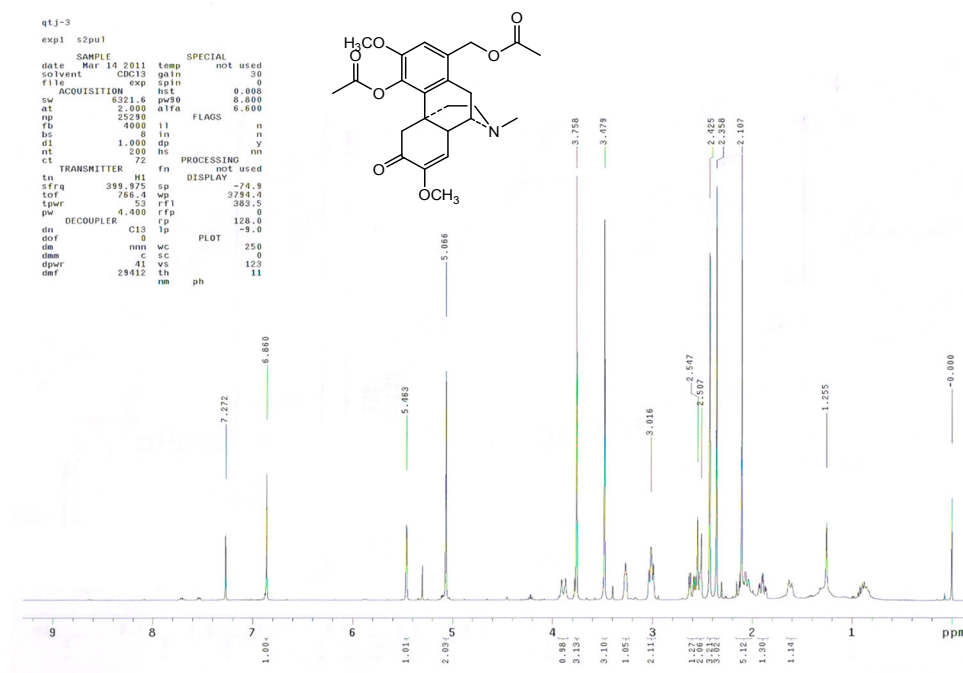

Figure S1. <sup>1</sup>H-NMR spectra of compound 1a.

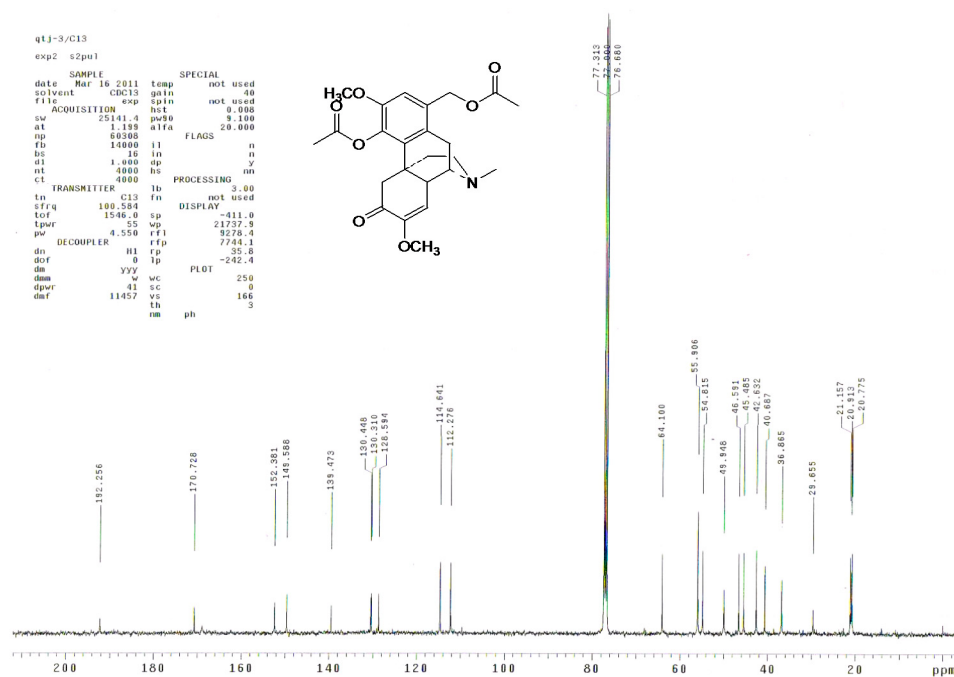

Figure S2. <sup>13</sup>C-NMR spectra of compound 1a.

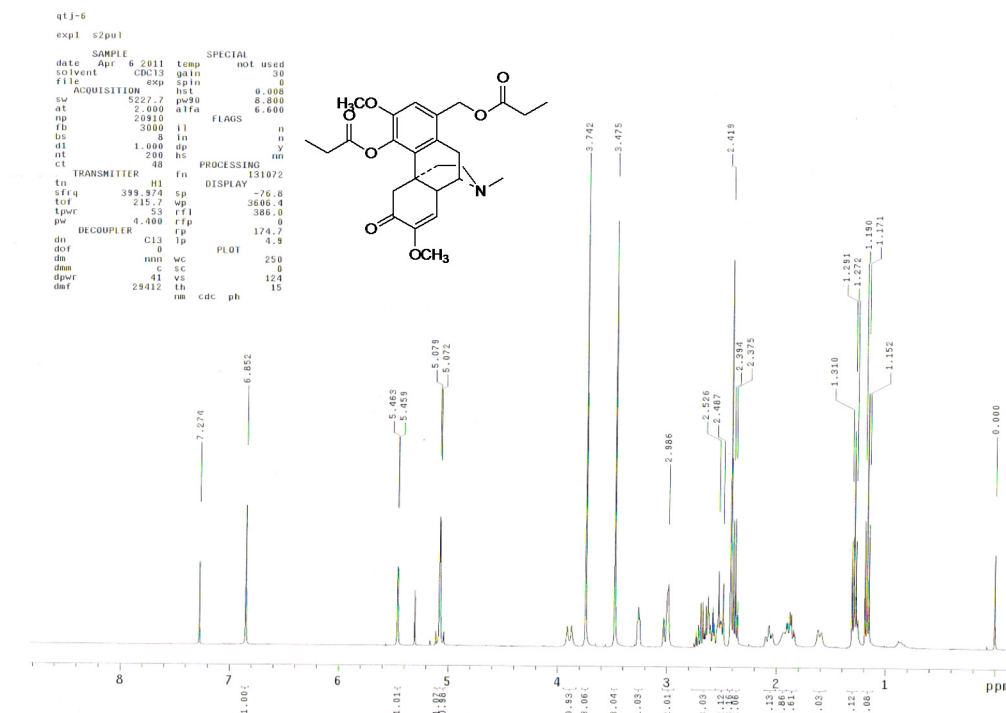Figure S3. <sup>1</sup>H-NMR spectra of compound 1b.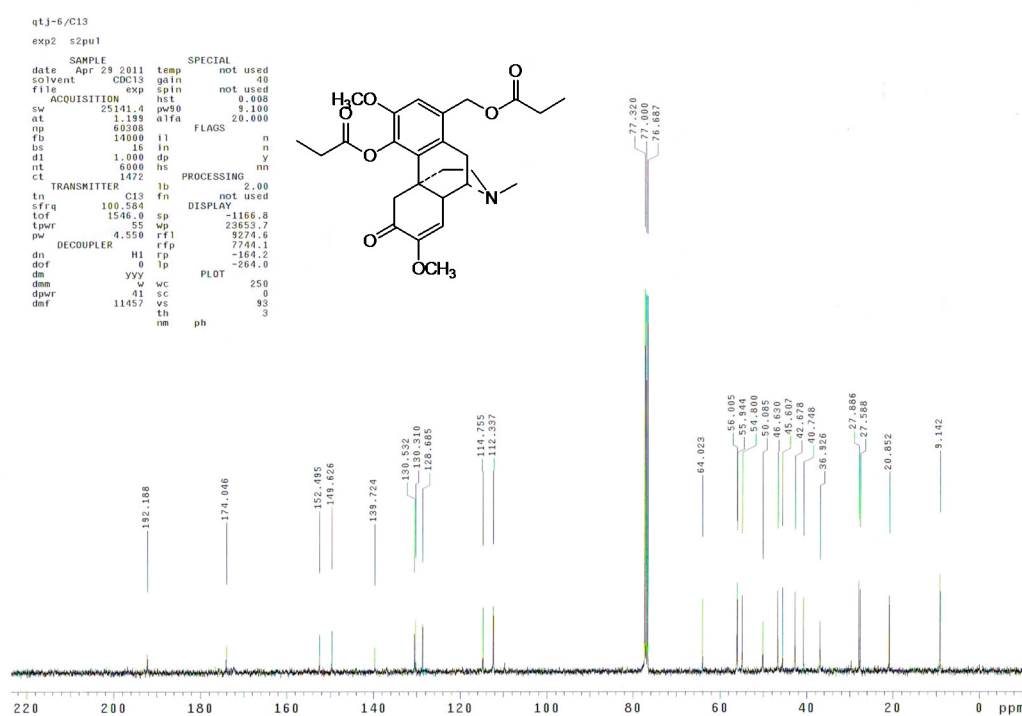Figure S4. <sup>13</sup>C-NMR spectra of compound 1b.

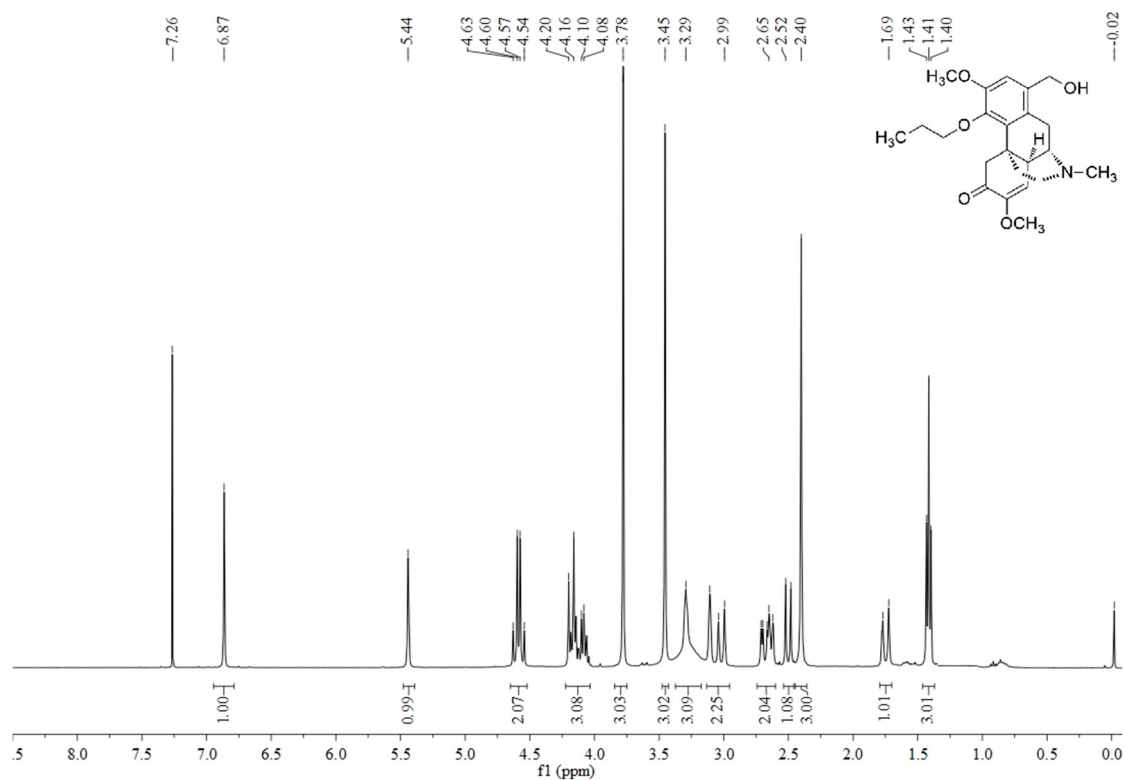Figure S5. <sup>1</sup>H-NMR spectra of compound 2a.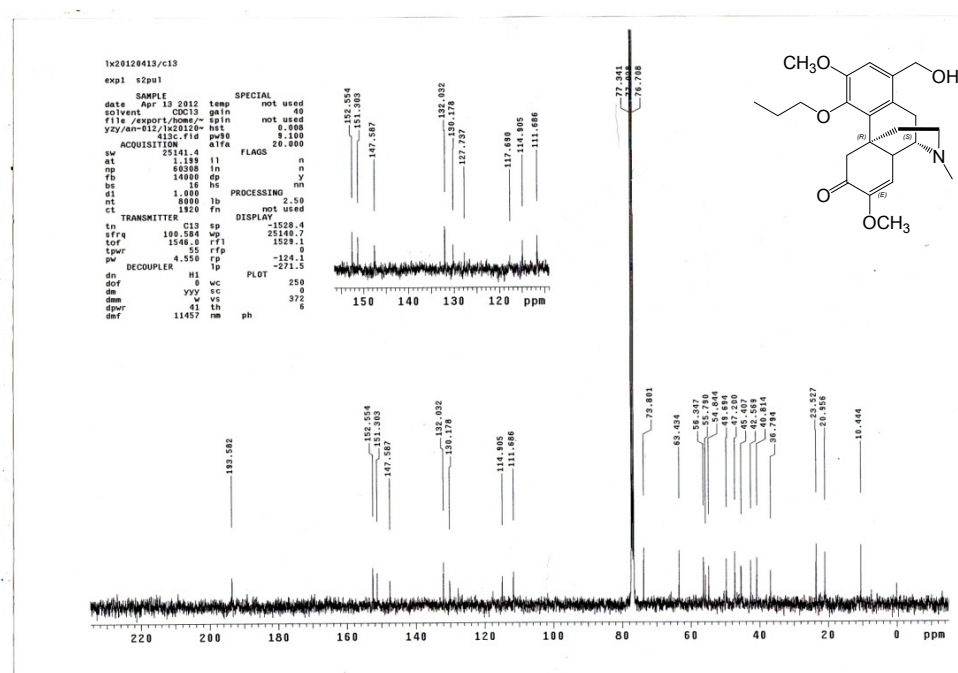Figure S6. <sup>13</sup>C-NMR spectra of compound 2a.

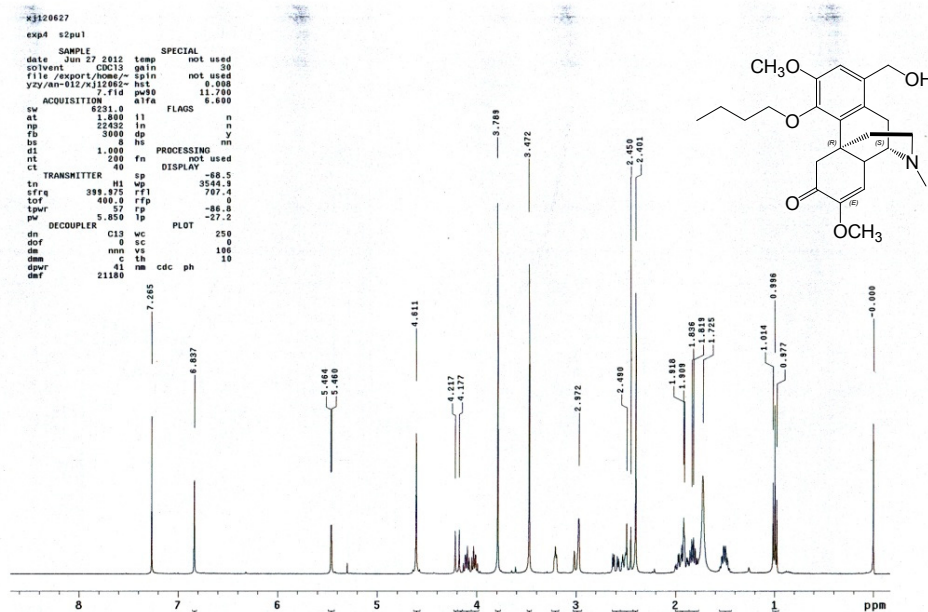Figure S7. <sup>1</sup>H-NMR spectra of compound 2b.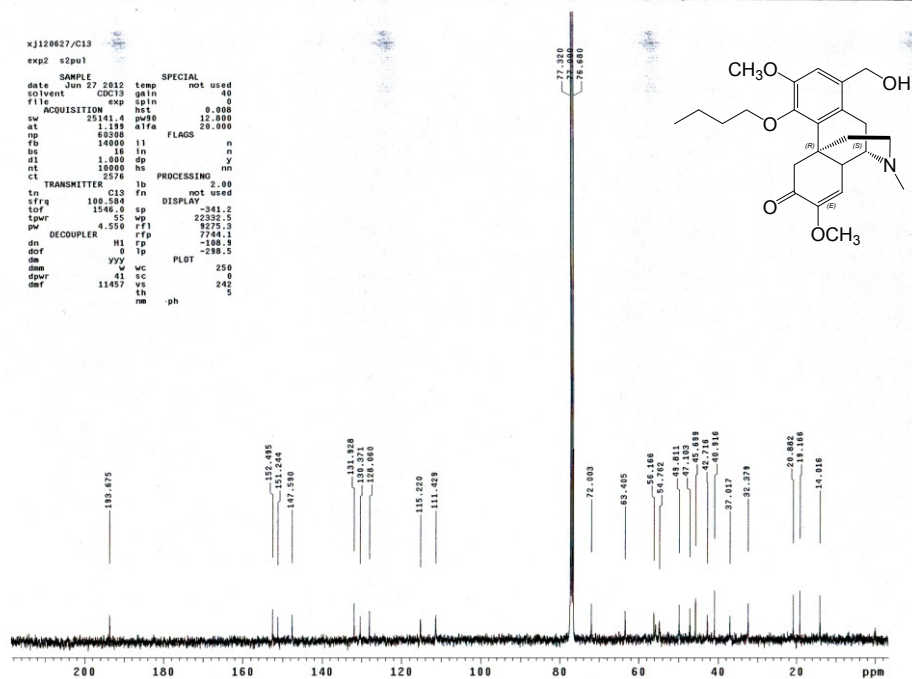Figure S8. <sup>13</sup>C-NMR spectra of compound 2b.

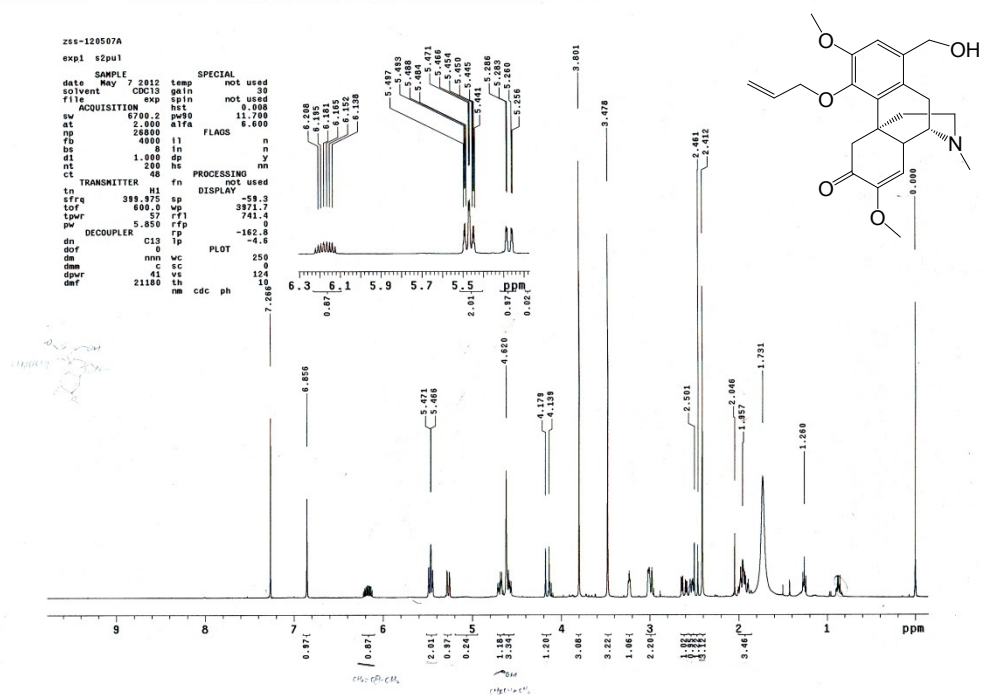Figure S9. <sup>1</sup>H-NMR spectra of compound 2c.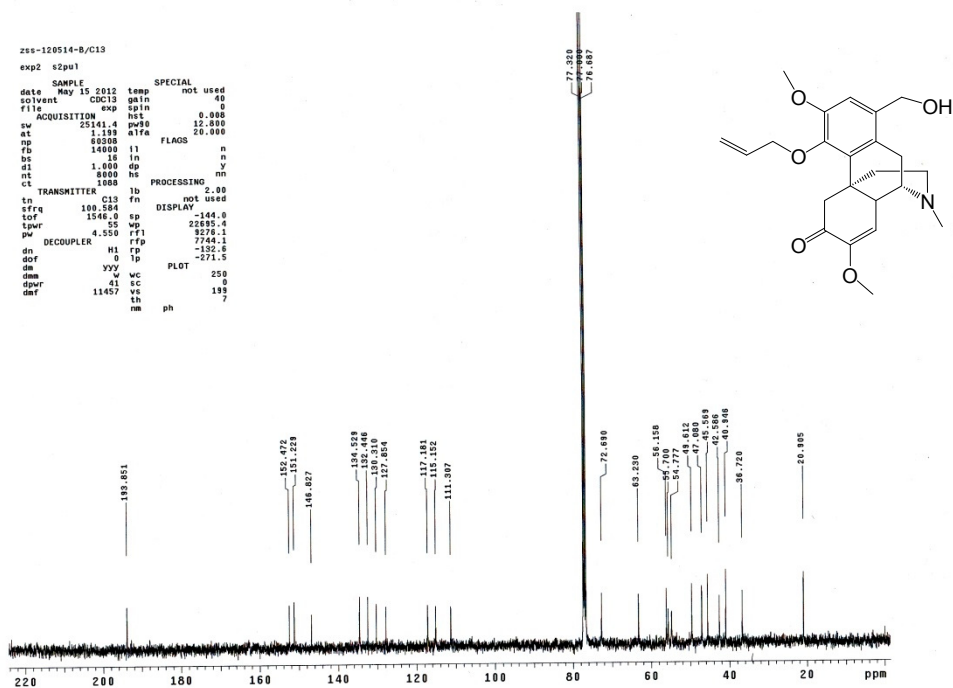Figure S10. <sup>13</sup>C-NMR spectra of compound 2c.

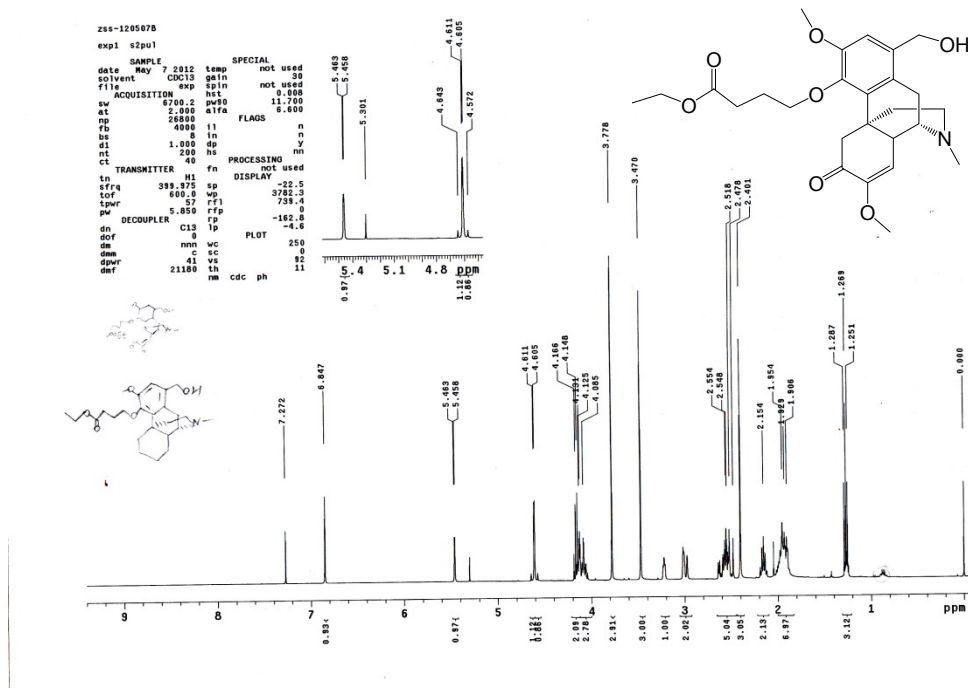

**Figure S11.**  $^1\text{H}$ -NMR spectra of compound **2d**.

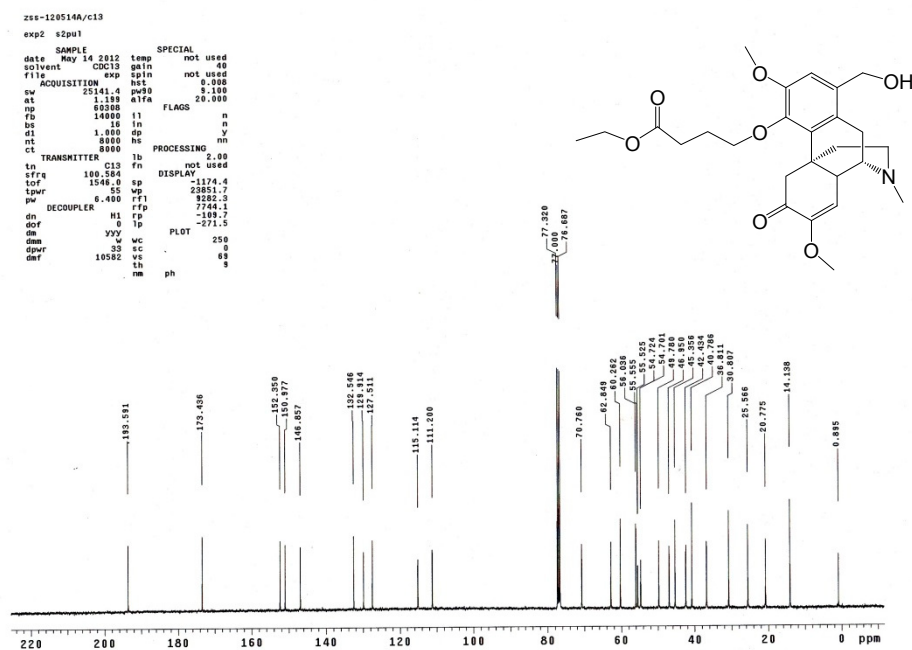

**Figure S12.**  $^{13}\text{C}$ -NMR spectra of compound **2d**.

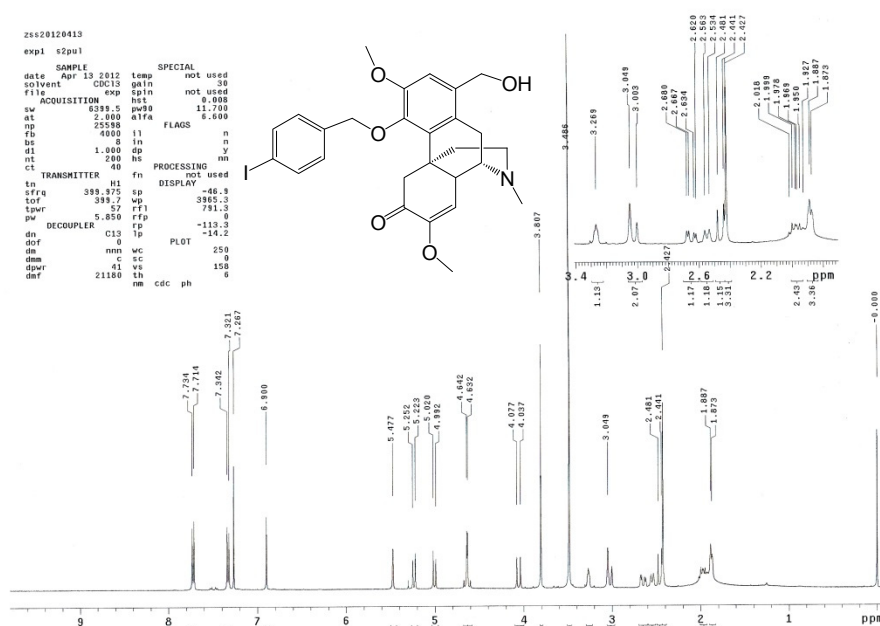

**Figure S13.**  $^1\text{H}$ -NMR spectra of compound **2e**.

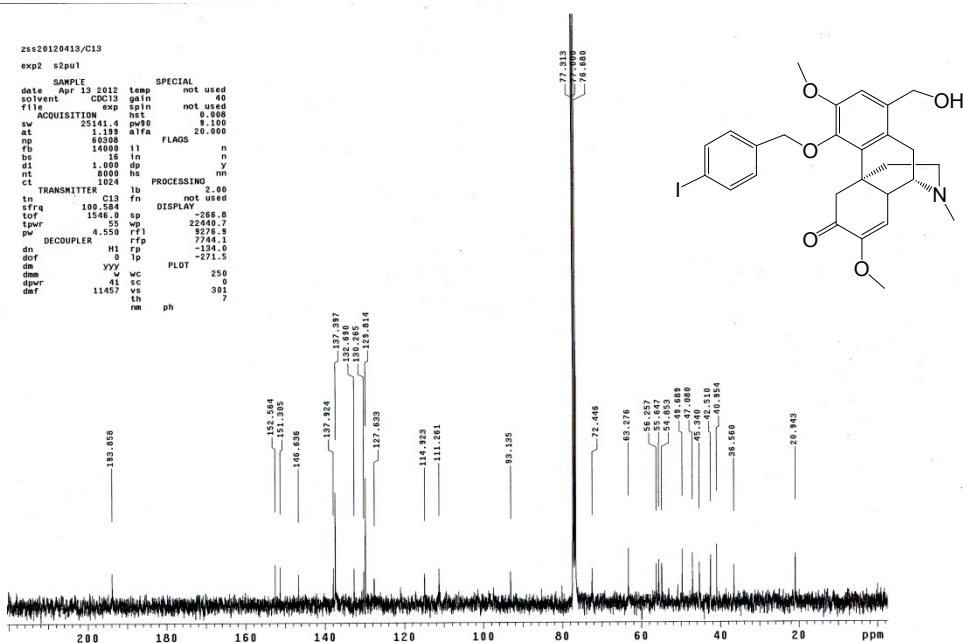

**Figure S14.**  $^{13}\text{C}$ -NMR spectra of compound **2e**.

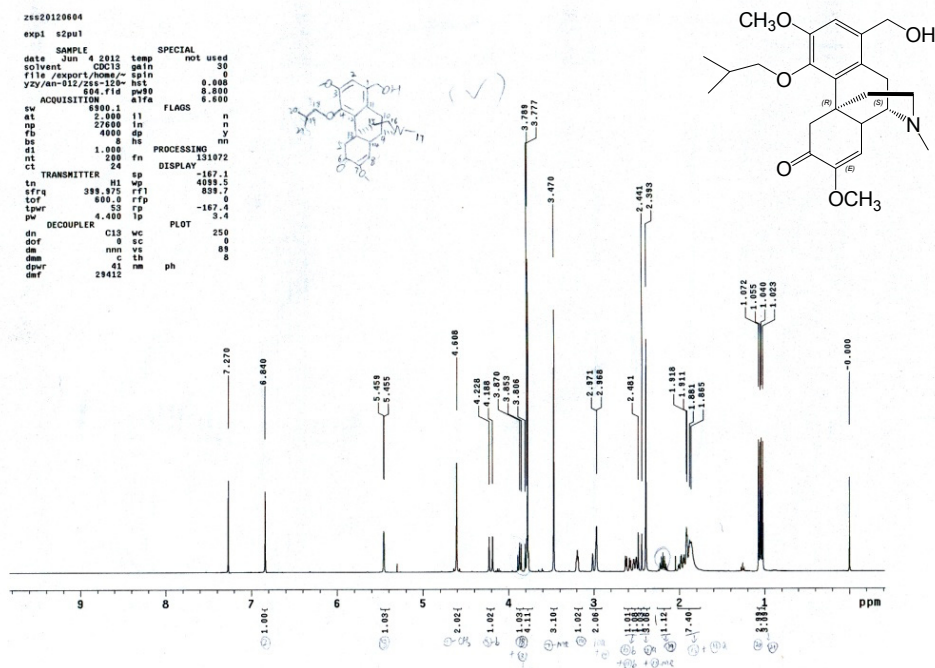Figure S15. <sup>1</sup>H-NMR spectra of compound 2f.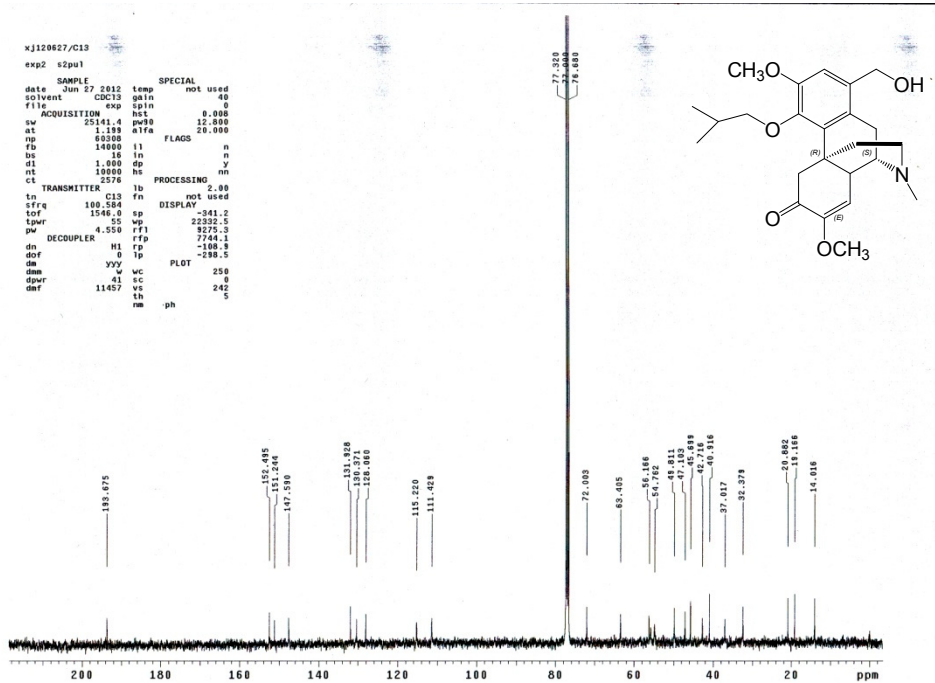Figure S16. <sup>13</sup>C-NMR spectra of compound 2f.
